# Supplementary material
Source: Springer Nature journal article supplement (https://www.springermedizin.de/resource/supplementary/12968_2013_3934_MOESM2_ESM.pdf/9584916)

**Subject 3****Subject 5****Subject 6****a**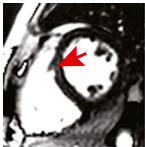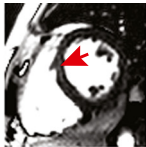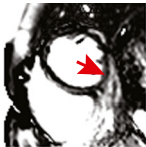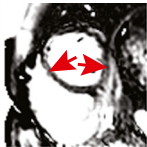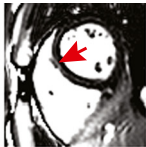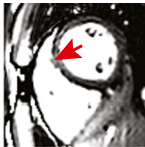**b**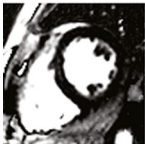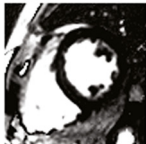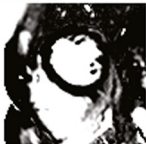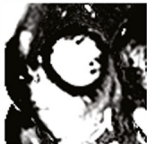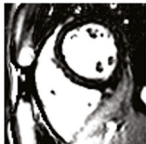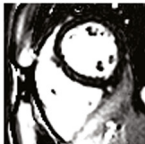

Supplement: MOESM2 [file 9584916]
